# Supplementary material for: Prevalence of steatosis and fibrosis in young adults in the UK: a population-based study
Source: PubMed Central journal article supplement — Lancet Gastroenterol Hepatol. 2020 Jan 15;5(3):295–305. doi: 10.1016/S2468-1253(19)30419-4 (PMC7026693; doi:10.1016/s2468-1253(19)30419-4), 2020-01-15
Supplement: mmc1.pdf [file mmc1.pdf]

# THE LANCET

## Gastroenterology & Hepatology

### Supplementary appendix

This appendix formed part of the original submission and has been peer reviewed.  
We post it as supplied by the authors.

Supplement to: Abeysekera KWM, Fernandes GS, Hammerton G, et al.  
Prevalence of steatosis and fibrosis in young adults in the UK: a population-based study.  
*Lancet Gastroenterol Hepatol* 2020; published online Jan 15. [https://doi.org/10.1016/S2468-1253\(19\)30419-4](https://doi.org/10.1016/S2468-1253(19)30419-4).

| Variable                                        |              | Fibrosis Score with IQR/M <30% | Fibrosis Scores with IQR/M ≥30% | P value   |
|-------------------------------------------------|--------------|--------------------------------|---------------------------------|-----------|
| <b>CAP Score</b><br>(dB/m)                      | Median (IQR) | 203.0 (173.0-238.0)            | 230.5 (180.0-264.0)             | p=0.0017* |
| <b>BMI</b><br>(kg/m <sup>2</sup> )              | Median (IQR) | 23.7 (21.5-26.7)               | 27.6 (23.3-33.4)                | p<0.0001‡ |
| <b>Waist circumference-to-Height Ratio</b>      | Median (IQR) | 0.46 (0.43-0.50)               | 0.51 (0.44-0.59)                | p<0.0001‡ |
| <b>ALT</b><br>(10-35U/l)                        | Median (IQR) | 20.5 (15.3-29.2)               | 19.6 (14.6-33.7)                | p=0.91‡   |
| <b>AST</b><br>(10-35U/l)                        | Median (IQR) | 24.1 (20.6-29.2)               | 23.3 (20.0-28.6)                | p=0.34‡   |
| <b>GGT</b><br>(<40 U/l)                         | Median (IQR) | 16.0 (12.0-22.0)               | 16.0 (13.0-21.0)                | p=0.76‡   |
| <b>HOMA-IR</b><br>(<1.68)                       | Median (IQR) | 1.72 (1.20-2.53)               | 2.36 (1.61-3.59)                | p<0.0001‡ |
| <b>Cholesterol</b><br>(<5.2mmol/l)              | Median (IQR) | 4.3 (3.9-4.9)                  | 4.5 (4.0-4.9)                   | p=0.42*   |
| <b>Triglycerides</b><br>(<1.7mmol/l)            | Median (IQR) | 0.8 (0.6-1.1)                  | 0.9 (0.7-1.2)                   | p=0.69‡   |
| <b>LDL</b><br>(mmol/l)                          | Median (IQR) | 2.4 (1.9-2.9)                  | 2.5 (2.0-2.9)                   | p=0.47*   |
| <b>VLDL</b><br>(mmol/l)                         | Median (IQR) | 0.4 (0.3-0.5)                  | 0.4 (0.3-0.5)                   | p=0.69‡   |
| <b>HDL</b><br>(>1.45mmol/l)                     | Median (IQR) | 1.5 (1.3-1.8)                  | 1.6 (1.3-1.8)                   | p=0.82*   |
| <b>Metabolic Syndrome</b><br>(≥3 of 5 criteria) | n=172        | 162 (9.9%)                     | 10 (28.6%)                      | p<0.0001  |

\* Two sample t test

‡ Mann-Whitney Test

Footnote: CAP: controlled attenuation parameter; HOMA-IR: homeostatic model assessment of insulin resistance; metabolic syndrome criteria (≥3 of 5 criteria): (1) Male waist circumference ≥102cm or female waist circumference ≥88cm. (2) Triglyceride level ≥1.7mmol/l. (3) HDL in men <1.93mmol or in women <1.3mmol/l. (4) Systolic blood pressure ≥130mmHg or diastolic blood pressure ≥85mmHg. (5) Fasting glucose ≥5.6mmol/l
